# Supplementary material for: Feline coronavirus replication is affected by both cyclophilin A and cyclophilin B
Source: PubMed Central journal article supplement (PMC7079567; doi:10.1099/jgv.0.000663), 2017-03-13

Supplementary table 1: Amino acid sequences of dominant negative mutants of CypA

---

**feline-CypA**

-GSCF**H**R**I**PG**F**MCQGGDFTRHNGTGGK**S**I**Y**GEKFDDENFILKHTGPGILSMANAGPNTNGS  
QFFICTAKTEWLDGKH**V**VFGM-

**feline-CypA H126Q**

-GSCF**H**R**I**PG**F**MCQGGDFTRHNGTGGK**S**I**Y**GEKFDDENFILKHTGPGILSMANAGPNTNGS  
QFFICTAKTEWLDGK**Q**VVFGM-

**feline-CypA R55A**

-GSCF**H**A**I**PG**F**MCQGGDFTRHNGTGGK**S**I**Y**GEKFDDENFILKHTGPGILSMANAGPNTNGS  
QFFICTAKTEWLDGKH**V**VFGM-

**feline-CypA F60A**

-GSCF**H**R**I**PG**A**MCQGGDFTRHNGTGGK**S**I**Y**GEKFDDENFILKHTGPGILSMANAGPNTNG  
SQFFICTAKTEWLDGKH**V**VFGM-

---

Bold characters represent original and substituted amino acids respectively.

Supplementary table 2: Amino acid sequences of dominant negative mutants of CypB

---

**feline-CypB**

NSKFHRVIKDFMIQGGDFTRGDGTGGKSIYGERFPDENFKLKHYGPGWVSMANAGKDTNGSQFFITTVKTAWLDGKHV

VFGKVLEGMEVVRKVESTKTDSRDKPLKDVIIADCGKIEVEKPFIAIKE

**feline-CypB R62A**

NSKFH**AV**IKDFMIQGGDFTRGDGTGGKSIYGERFPDENFKLKHYGPGWVSMANAGKDTNGSQFFITTVKTAWLDGKHV

VFGKVLEGMEVVRKVESTKTDSRDKPLKDVIIADCGKIEVEKPFIAIKE

**feline-CypB F67A**

NSKFHRVIK**DAMI**QGGDFTAGDGTGGKSIYGERFPDENFKLKHYGPGWVSMANAGKDTNGSQFFITTVKTAWLDGKHV

VFGKVLEGMEVVRKVESTKTDSRDKPLKDVIIADCGKIEVEKPFIAIKE

---

Bold characters represent original and substituted amino acids respectively.

**Fig. S1.** All three predicted PPIase-active sites used in this study reduce affinities between CypA and CsA as shown by MOE software analysis. (a) Computational inference of 3D-structure of feline CypA and CsA. (b) The larger number (kcal/mol) in reduced affinity (dAffinity) indicates more reduction of CsA-binding affinity with CypA. Affinity between CypA and CsA is reduced by point-mutations of CypA (CypA-R55A, CypA-R60A, and CypA- H126Q) as shown in dAffinity. Each amino acid residue substitutes an original amino acid residue for Ala. (c) Protein stability is decreased by point-mutations. The larger number (kcal/mol) in reduced stability (dStability) indicates more reduction in protein stability. (d) Blue polygonal line graph indicates affinity between CsA and CypA on each amino acid site. Red polygonal line graph shows reduction of protein stability on each amino acid site. The larger kcal/mol indicates more reduction of protein stability and affinity between CypA and CsA.

**Fig. S2.** Both predicted PPIase-active sites used in this study reduce affinities between CypB and CsA as shown by MOE software analysis. (a) Computational inference of 3D-structure of feline CypB and CsA. (b) The larger number (kcal/mol) in reduced affinity (dAffinity) indicates more reduction of CsA-binding affinity with CypB. Affinity between CypB and CsA is reduced by point-mutations of CypB (CypB-R62A

and F67A) as shown in dAfinity. Each amino acid residue substitutes an original amino acid residue for Ala. (c) Protein stability is decreased by point mutations. The larger number (kcal/mol) in reduced stability (dStability) indicates more reduction of protein stability. (d) Blue polygonal line graph indicates affinity between CsA and CypB on each amino acid site. Red polygonal line graph shows reduction of protein stability on each amino acid site. The larger kcal/mol indicates more reduction of protein stability and affinity between CypB and CsA.

(a)

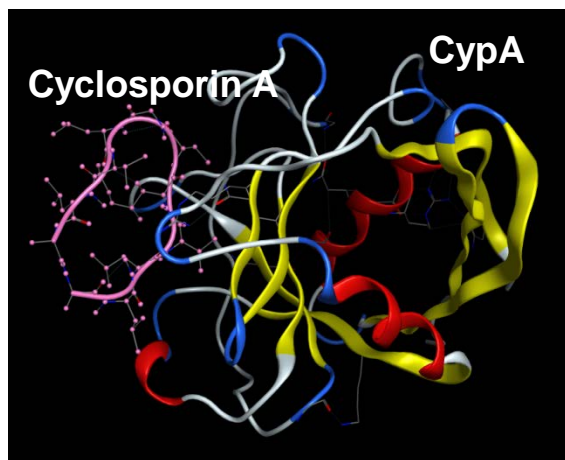

(b)

| Affinity down top 10 |           |
|----------------------|-----------|
| Site number          | dAffinity |
| 122                  | 8.2506    |
| 126                  | 8.1432    |
| 60                   | 6.29      |
| 55                   | 5.8813    |
| 121                  | 4.4463    |
| 111                  | 3.1672    |
| 150                  | 3.0488    |
| 125                  | 2.6268    |
| 58                   | 1.7697    |
| 61                   | 1.4172    |

(c)

| Stability down top 10 |            |
|-----------------------|------------|
| Site number           | dStability |
| 121                   | 5.0075     |
| 113                   | 4.3459     |
| 22                    | 4.3184     |
| 48                    | 4.2729     |
| 7                     | 4.252      |
| 83                    | 4.2232     |
| 60                    | 4.1833     |
| 53                    | 4.057      |
| 112                   | 4.0443     |
| 129                   | 3.9625     |

(d)

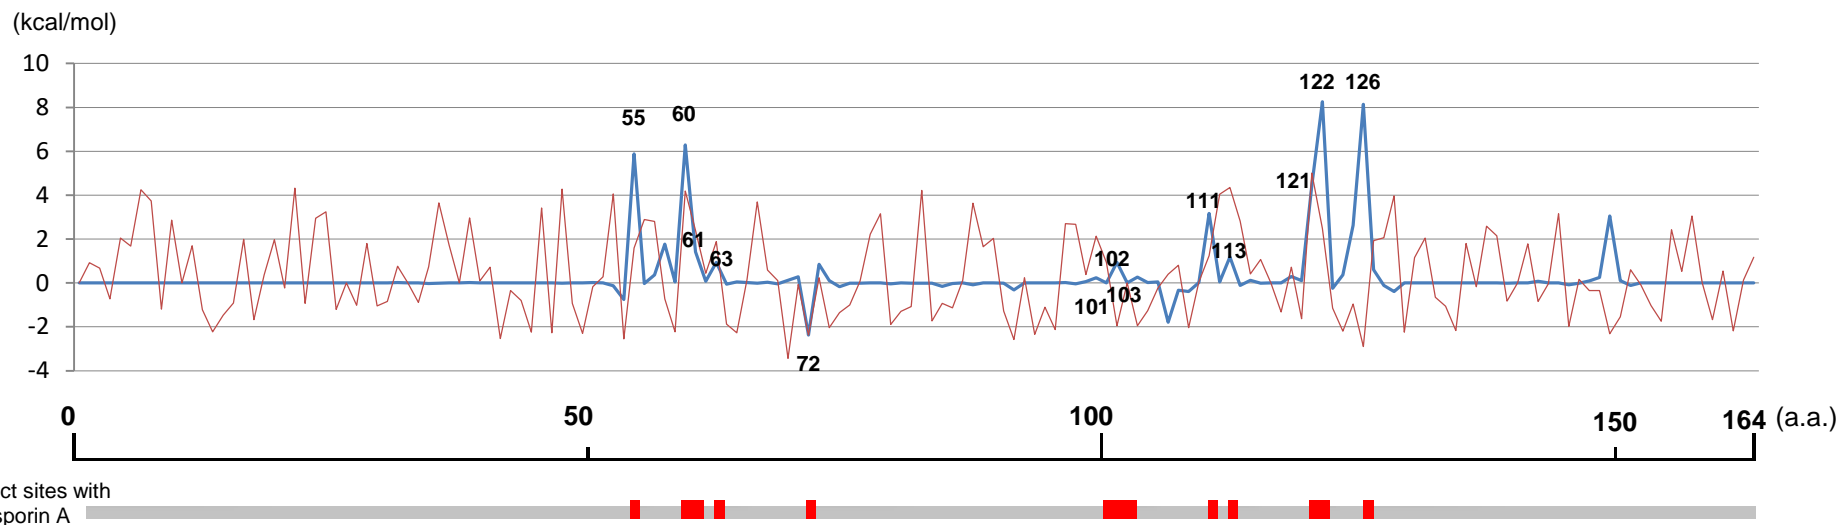

(a)

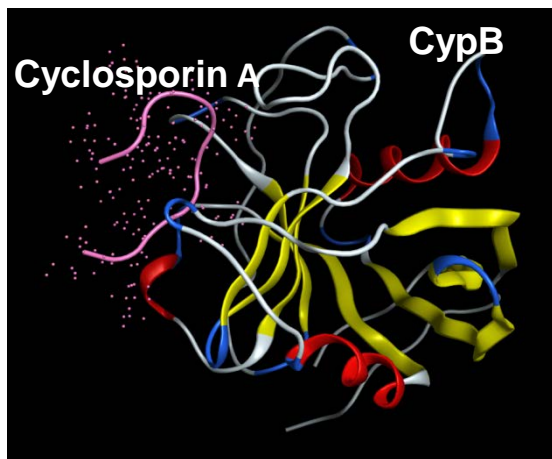

(b)

| Affinity down top 10 |           |
|----------------------|-----------|
| Site number          | dAffinity |
| 129                  | 9.2771    |
| 133                  | 6.5493    |
| 67                   | 6.4817    |
| 62                   | 6.3549    |
| 128                  | 4.4601    |
| 118                  | 3.3091    |
| 159                  | 2.4897    |
| 120                  | 1.8404    |
| 68                   | 1.7758    |
| 89                   | 1.1906    |

(c)

| Stability down top 10 |            |
|-----------------------|------------|
| Site number           | dStability |
| 104                   | 5.4276     |
| 127                   | 5.0325     |
| 120                   | 4.531      |
| 67                    | 4.4057     |
| 136                   | 4.1882     |
| 32                    | 4.1864     |
| 119                   | 4.1847     |
| 55                    | 4.1721     |
| 90                    | 3.9242     |
| 15                    | 3.8377     |

(d)

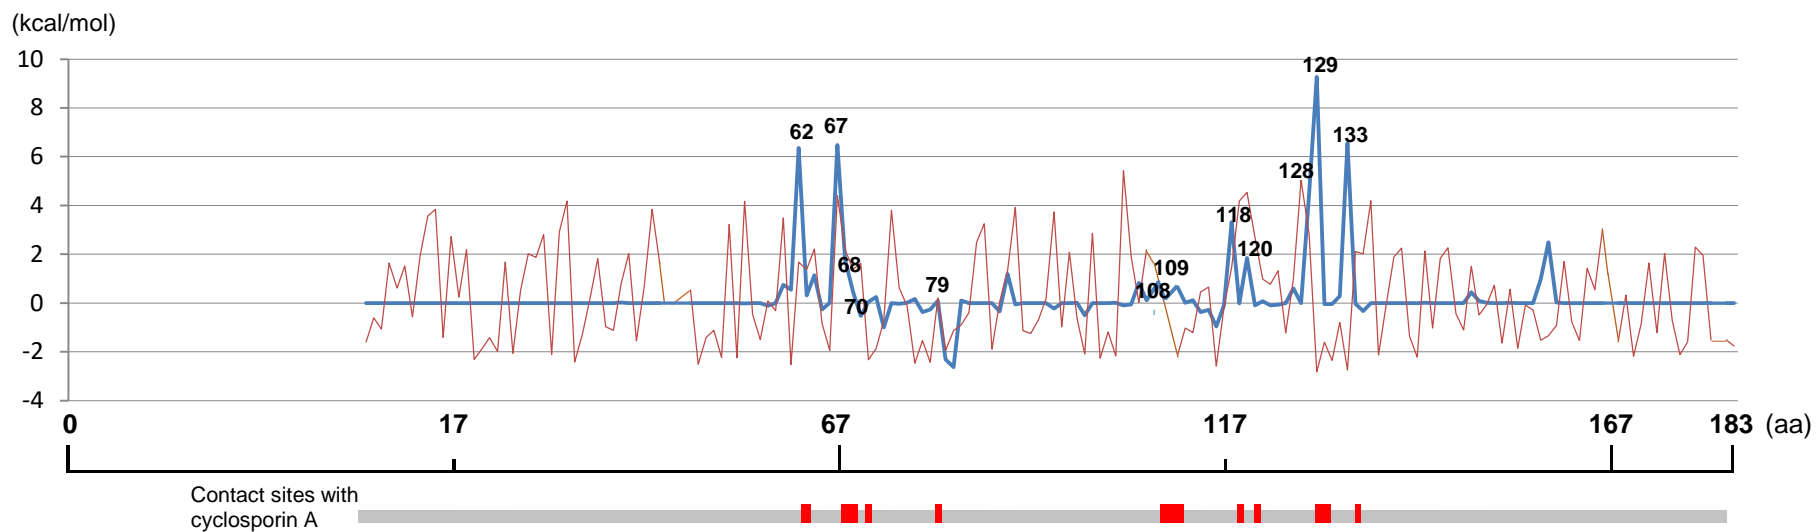

Supplement: jgv-98-190-s001.pdf [file jgv-98-190-s001.pdf]
